# Supplementary material for: Prediction of the acceptance of telemedicine among rheumatic patients: a machine learning-powered secondary analysis of German survey data
Source: PubMed Central journal article supplement (PMC10866795; doi:10.1007/s00296-023-05518-9), 2024-01-11
Supplement: 296_2023_5518_MOESM6_ESM.pdf [file 296_2023_5518_MOESM6_ESM.pdf]

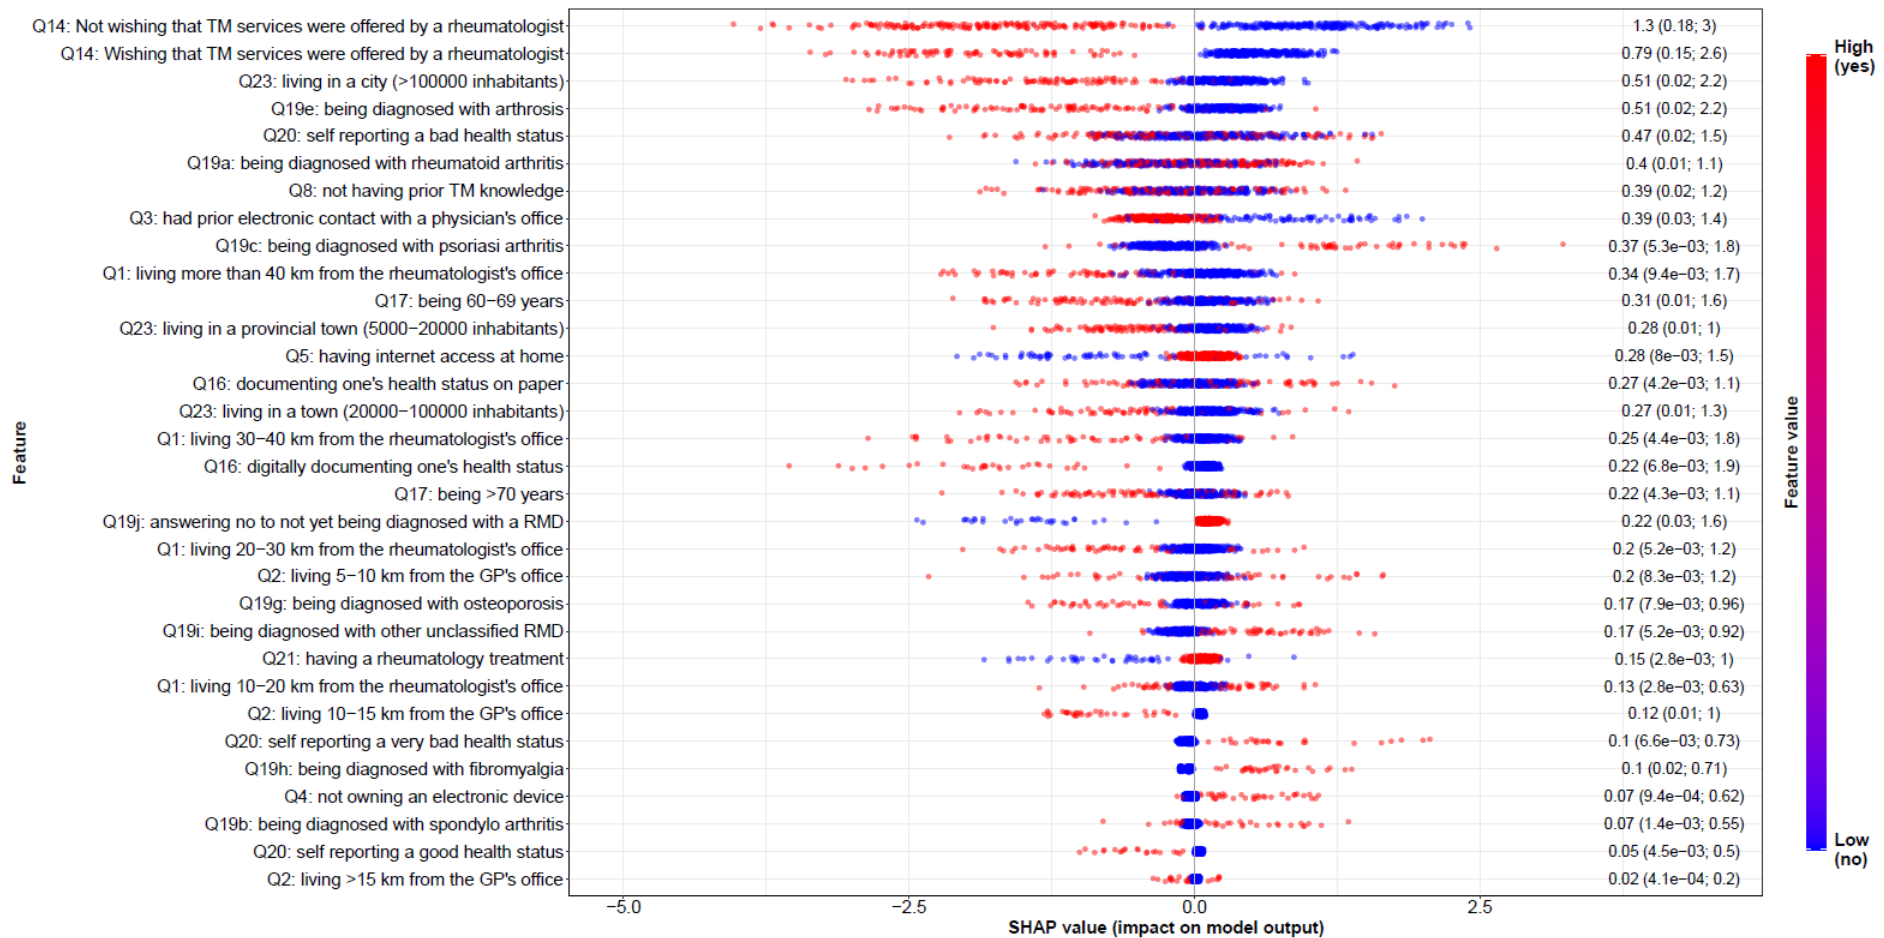

**Figure S6:** Feature importance according to SHAP values – not answered/do not know vs. rest classification

SHAP value (x-axis) for each patient and feature are represented with a point. Positive SHAP values imply an impact to the model toward not answering or do not know answers regarding TM try, while negative values impact the model toward yes and no answers regarding TM try. For each feature, the mean and 95% CI of the absolute SHAP values are reported on the right of the graph. High SHAP value (in absolute value) indicate a high impact on the model output. Red colors indicate that a patient answered yes to the considered question (y-axis) while blue colors refer to “no” answers.
